1     **SARS-CoV-2-specific T cells associate with reduced lung function and inflammation in**  
2                     **pulmonary post-acute sequelae of SARS-CoV-2**

3                     Virus-specific T cells associate with lung function in long COVID-19  
4

5     Katherine M. Littlefield<sup>1</sup>, Renée O. Watson<sup>1</sup>, Jennifer M. Schneider<sup>1</sup>, Charles P. Neff<sup>1</sup>, Eiko  
6             Yamada<sup>1</sup>, Min Zhang<sup>1</sup>, Thomas B. Campbell<sup>1</sup>, Michael T. Falta<sup>1</sup>, Sarah E. Jolley<sup>1</sup>,  
7                     Andrew P. Fontenot<sup>1,2</sup>, Brent E. Palmer<sup>1,\*</sup>

8     <sup>1</sup>Department of Medicine, University of Colorado Anschutz Medical Campus, Aurora, CO 80045 USA

9     <sup>2</sup>Department of Immunology and Microbiology, University of Colorado Anschutz Medical Campus, Aurora, CO  
10     80045 USA  
11

12     \* Corresponding author

13     E-mail: [brent.palmer@cuanschutz.edu](mailto:brent.palmer@cuanschutz.edu)  
14

15     **Author contributions**

16     Conceptualization and methodology, K.M.L. and B.E.P.; Investigation: K.M.L., R.W., E.Y.,  
17     M.Z., J.M.S.; Resources, S.E.J. and T.B.C.; Data Curation, K.M.L. and R.W.; Writing – Original  
18     Draft, K.M.L. and B.E.P.; Writing – Review & Editing, K.M.L., E.Y., C.P.N., S.E.J., J.M.S.,  
19     M.T.F., A.P.F., and B.E.P.; Visualization, K.M.L., R.W., J.M.S., C.P.N., A.P.F., and B.E.P.;  
20     Supervision, Project Administration and Funding Acquisition, B.E.P.  
21  
22

23 **Abstract**

24 As of January 2022, at least 60 million individuals are estimated to develop post-acute sequelae of  
25 SARS-CoV-2 (PASC) after infection with severe acute respiratory syndrome coronavirus 2  
26 (SARS-CoV-2). While elevated levels of SARS-CoV-2-specific T cells have been observed in  
27 non-specific PASC, little is known about their impact on pulmonary function which is  
28 compromised in the majority of these individuals. This study compares frequencies of SARS-CoV-  
29 2-specific T cells and inflammatory markers with lung function in participants with pulmonary  
30 PASC and resolved COVID-19 (RC). Compared to RC, participants with respiratory PASC had  
31 up to 34-fold higher frequencies of IFN- $\gamma$ - and TNF- $\alpha$ -producing SARS-CoV-2-specific CD4<sup>+</sup> and  
32 CD8<sup>+</sup> T cells in peripheral blood and elevated levels of plasma CRP and IL-6. Importantly, in  
33 PASC participants the frequency of TNF- $\alpha$ -producing SARS-CoV-2-specific CD4<sup>+</sup> and CD8<sup>+</sup> T  
34 cells, which exhibited the highest levels of Ki67 indicating they were actively dividing, correlated  
35 positively with plasma IL-6 and negatively with measures of lung function, including forced  
36 expiratory volume in one second (FEV1), while increased frequencies of IFN- $\gamma$ -producing SARS-  
37 CoV-2-specific T cells associated with prolonged dyspnea. Statistical analyses stratified by age,  
38 number of comorbidities and hospitalization status demonstrated that none of these factors affect  
39 differences in the frequency of SARS-CoV-2 T cells and plasma IL-6 levels measured between  
40 PASC and RC cohorts. Taken together, these findings demonstrate elevated frequencies of SARS-  
41 CoV-2-specific T cells in individuals with pulmonary PASC are associated with increased  
42 systemic inflammation and decreased lung function, suggesting that SARS-CoV-2-specific T cells  
43 contribute to lingering pulmonary symptoms. These findings also provide mechanistic insight on  
44 the pathophysiology of PASC that can inform development of potential treatments to reduce  
45 symptom burden.

46 **Author Summary**

47 Long COVID-19 or post-acute sequelae of SARS-CoV-2 (PASC) impacts 20-30% of those  
48 infected with SARS-CoV-2 and is characterized by COVID-19 symptoms exceeding 4 weeks from  
49 symptom onset. While those with PASC experience a wide variety of persistent symptoms  
50 including shortness of breath, cough, chest pain, irregular heartbeat, brain fog, fatigue, and  
51 intermittent fever, lung-related conditions are the most common. Although, infection with SARS-  
52 CoV-2 is clearly the inciting factor for PASC, the mechanisms responsible for long-term lung  
53 dysfunction are unclear and current treatments are ineffective at resolving pulmonary symptoms.  
54 Generalized PASC has been associated with SARS-CoV-2-specific T cells, a component of  
55 adaptive immunity, suggesting that residual virus may persist. Here, we investigated the frequency  
56 and function of virus-specific T cells in the blood of individuals with pulmonary PASC and  
57 correlated their presence with systemic inflammation and lung function. Our findings  
58 demonstrated that T cells specific for SARS-CoV-2 are elevated in the blood of those with  
59 pulmonary PASC and are associated with increased IL-6, a cytokine strongly associated with  
60 COVID-19 severity, and decreased lung function. These findings provide mechanistic insight into  
61 the pathophysiology of pulmonary PASC needed for the development of new treatments to  
62 improve quality of life for those affected.

63

64

65

66 **Introduction**

67 After infection with severe acute respiratory syndrome coronavirus 2 (SARS-CoV-2), 20-30% of  
68 survivors experience prolonged symptoms that can significantly impact quality of life(1). “Long-  
69 COVID” or “Long-haul COVID” refers to individuals experiencing persistent symptoms that can  
70 involve multiple organ systems, including the lungs, heart, and brain(2-4). Officially named post-  
71 acute sequelae of SARS-CoV-2 (PASC), this syndrome is defined as new, continuing or recurring  
72 symptoms of COVID-19 that occur four or more weeks after initial infection(1). Hallmark  
73 symptoms of PASC include persistent palpitations, neuropsychiatric conditions, anosmia and  
74 dysgeusia, with dyspnea and other respiratory ailments being the most common(5-7). Reduced  
75 lung volume and exercise capacity are commonly observed in survivors of COVID-19  
76 pneumonia(8), however, the appearance and persistence of PASC respiratory symptoms is not  
77 related to the severity of initial illness(9). As new SARS-CoV-2 variants potentially increase  
78 infection rates and disease severity(10, 11), mutations to viral surface proteins may also increase  
79 the prevalence of persistent symptoms(12). Early reports show sustained frequencies of SARS-  
80 CoV-2-specific T cells and elevated inflammatory systemic markers have been observed in non-  
81 specific PASC(13, 14), and understanding the immunologic mechanisms of pulmonary PASC is  
82 of vital importance for developing treatment options to reduce symptom burden.

83

84 The T cell adaptive immune response is well characterized in acute and convalescent cases of  
85 COVID-19 and contributes to virus clearance, protective immunity and inflammation(15). The  
86 frequency of SARS-CoV-2-specific T cells positively correlates with both serum antibody levels  
87 and disease severity; however, while SARS-CoV-2-specific antibodies remain relatively stable up  
88 to 240 days, virus-specific CD4<sup>+</sup> and CD8<sup>+</sup> T cell frequencies decline with a half-life of 3-5

89 months(16, 17). In mild/asymptomatic cases, SARS-CoV-2-specific T cells are polyfunctional and  
90 produce multiple cytokines(18); conversely, during severe disease, polyfunctional virus-specific  
91 T cells are underrepresented and are skewed towards a cytotoxic phenotype(19). Although SARS-  
92 CoV-2-specific T cells are protective in most cases, it has been shown they can contribute to the  
93 cytokine release syndrome seen in patients with severe COVID-19(20). Furthermore, CD8<sup>+</sup> T cells  
94 in the lung during acute infection are associated with inflammation, fibrosis, biomarkers of  
95 vascular injury, and poor outcomes(21, 22). Thus, while SARS-CoV-2-specific T cells likely play  
96 a role in PASC, the characteristics of these cells and their connections to systemic inflammation  
97 or pulmonary symptoms are currently unknown.

98

99 Here we determined the frequency and function of SARS-CoV-2-specific T cells in blood, and  
100 their relationship with the expression of plasma inflammatory markers and measures of lung  
101 function in individuals with pulmonary PASC. We found patients with pulmonary PASC had  
102 significantly elevated frequencies of IFN- $\gamma$ - and TNF- $\alpha$ -producing SARS-CoV-2-specific T cells  
103 compared to participants with resolved COVID-19 (RC). These virus-specific T cells were  
104 strongly associated with increased markers of inflammation and decreased lung function in PASC.  
105 These findings indicate pulmonary PASC may be, in part, driven by the production of  
106 inflammatory cytokines by SARS-CoV-2-specific T cells.

107

## 108 **Results**

### 109 **Cohort Descriptions**

110 Study participants were recruited between July 2020 and April 2021, prior to appearance of the  
111 B.1.617.2 or B.1.1.529 variants in Colorado(23). Patients were confirmed SARS-CoV-2 PCR  
112 positive by nasopharyngeal swab during the acute phase of infection. Participants categorized as  
113 pulmonary PASC experienced prolonged tussis, dyspnea and/or fatigue (S1 Table). The pulmonary  
114 PASC cohort reported symptoms lasting for a median duration of six months from symptom onset  
115 or hospital discharge. All RC participants reported no symptoms at the time of sample collection,  
116 and if RC participants subsequently did experience relapse of symptoms, they were excluded from  
117 the study. All participants with chronic or active infections other than SARS-CoV-2, using  
118 medications targeting IL-6, or antibiotic use within one month of sample collection were also  
119 excluded.

120

121 Clinical characteristics of the PASC and RC cohorts were similar to those observed by other  
122 groups(1, 9) and are highlighted in Table 1. Those with PASC were older than RC participants  
123 (median years (range), PASC=54 (22-69), RC=33 (22-71),  $P=0.003$ ) and 40% required  
124 hospitalization (duration 3-52 days: median=11 ( $P=0.01$ )) during acute COVID-19 infection  
125 (Table 1). Overall, no significant differences between PASC and RC cohorts in terms of pre-  
126 existing conditions were found (Table 1). Those with PASC experienced an average symptom  
127 duration of over 6 months while RC participants' average symptom duration was 12 days  
128 ( $P<0.0001$ ) (Fig. 1a). PASC participants reported a median of 9 symptoms while RC participants  
129 reported 6 symptoms during initial infection ( $P=0.002$ ). The median number of prolonged  
130 symptoms reported by those with PASC was 5 while those with RC reported none ( $P<0.0001$ )

131 (Fig. 1b). There were no significant differences in the total duration of symptoms between PASC  
132 participants who were hospitalized (PASC-H) and those with PASC who were not hospitalized  
133 (PASC-NH) ( $P=0.17$ ). PASC-NH participants reported a greater variety of symptoms during both  
134 the acute ( $P=0.03$ ) and post-acute phases ( $P=0.02$ ) of disease when compared to symptoms  
135 reported by PASC-H participants (Fig 1b). The average time from symptom onset to blood  
136 collection was 225 days for the PASC and 32 days for the RC cohorts (Table 1). Statistical analyses  
137 stratified by age (S1 and S4 Fig.), number of comorbidities (S1 and S4 Fig.), time to sample  
138 collection (S2 Fig.), and hospitalization status (Fig. 6a) demonstrated that none of these factors  
139 affected the differences in frequency of SARS-CoV-2 T cells and plasma IL-6 levels measured  
140 between PASC and RC cohorts.

141

**Table 1. Demographics of Cohorts.**

|                                               | Cohort       |                 | P Value <sup>a</sup> | PASC Hospitalized |              | P Value <sup>a</sup> |
|-----------------------------------------------|--------------|-----------------|----------------------|-------------------|--------------|----------------------|
|                                               | PASC         | RC              |                      | Yes               | No           |                      |
| Number of participants <sup>b</sup>           | 20           | 15              |                      | 8 <sup>Δ</sup>    | 12           |                      |
| Female                                        | 10 (50)      | 5 (33)          | ns                   | 2 (25)            | 8 (75)       | ns                   |
| Male                                          | 10 (50)      | 10 (66)         | ns                   | 6 (75)            | 4 (25)       | ns                   |
| Median time to sample <sup>c</sup><br>(Range) | 212 (64-396) | 32 (13-265)     | *** <sup>Δ</sup>     | 184.5 (31-383)    | 183 (45-332) | ns                   |
| Median Age (Range)                            | 53 (22-65)   | 34* (22-71)     | ** <sup>Δ</sup>      | 60 (49-69)        | 50 (22-62)   |                      |
| ICU Admission                                 | 6 (32)       | NA <sup>d</sup> | NA                   | 6 (75)            | NA           | NA                   |
| <b>Race and Ethnicity</b>                     |              |                 |                      |                   |              |                      |
| White                                         | 17           | 14              | ns                   | 6                 | 11           | ns                   |
| Black                                         | 2            | 1               | ns                   | 1                 | 1            | ns                   |
| American Indian/Alaska<br>Native              | 0            | 2               | ns                   | 0                 | 0            | ns                   |
| Other                                         | 1            | 0               | ns                   | 1                 | 0            | ns                   |
| Hispanic or Latin Origin                      | 5            | 4               | ns                   | 3                 | 2            | ns                   |
| <b>Underlying Medical Condition</b>           |              |                 |                      |                   |              |                      |
| Any                                           | 10 (50)      | 3 (20)          | ns <sup>Δ</sup>      | 4 (50)            | 6 (50)       | ns                   |
| Hypertension                                  | 7 (35)       | 0 (0)           | *                    | 2 (38)            | 4 (33)       | ns                   |
| Pulmonary Disease                             | 2 (10)       | 1 (7)           | ns                   | 0 (0)             | 2 (17)       | ns                   |
| Immune System Disease                         | 1 (5)        | 0 (0)           | ns                   | 0 (0)             | 1 (8)        | ns                   |
| Cancer                                        | 1 (5)        | 0 (0)           | ns                   | 0 (0)             | 1 (8)        | ns                   |
| Kidney Disease                                | 1 (5)        | 1 (7)           | ns                   | 0 (0)             | 1 (8)        | ns                   |
| Metabolic Disease                             | 5 (25)       | 0 (0)           | ns                   | 4 (50)            | 1 (8)        | ns                   |
| <b>Medications during Hospitalization</b>     |              |                 |                      |                   |              |                      |
| Convalescent Plasma                           | 3 (15)       | NA              | NA                   | 3 (38)            | NA           | NA                   |
| Hydroxychloroquine                            | 4 (20)       | NA              | NA                   | 4 (50)            | NA           | NA                   |
| Remdesivir                                    | 4 (20)       | NA              | NA                   | 4 (50)            | NA           | NA                   |
| Dexamethasone                                 | 4 (20)       | NA              | NA                   | 4 (50)            | NA           | NA                   |
| Tocilizumab                                   | 0 (0)        | NA              | NA                   | 0 (0)             | NA           | NA                   |

<sup>a</sup>Mann-Whitney tests were used to determine statistical significance, ns = not significant \* = P<0.05, \*\* = P<0.005, \*\*\* = P<0.0005.

<sup>b</sup>All values are number of participants with the percentage of the cohort in parentheses unless otherwise specified.

<sup>c</sup>Median number of days from first reported symptom to collection of blood.

<sup>d</sup>NA=Not applicable.

<sup>Δ</sup>Indicates stratification analyses were performed demonstrating these differences do not influence SARS-CoV-2-specific T cell frequencies (S1 and S2 Fig.) and levels of plasma IL-6 (S4 Fig.).

## 142 Elevated SARS-CoV-2-specific T cells in pulmonary PASC

143 We measured the frequency of SARS-CoV-2-specific T cells in blood using intracellular cytokine  
 144 (IFN- $\gamma$ , TNF- $\alpha$ , and IL-2) staining after stimulation with peptide pools of the SARS-CoV-2 spike  
 145 (S), nucleocapsid (N) or membrane (M) surface-expressed proteins. Representative density plots  
 146 of SARS-CoV-2-specific T cell populations are shown (Fig. 2a). First, we analyzed the combined



147 frequency of SARS-CoV-2-specific T cells for all three proteins. PASC participants had  
148 significantly increased frequencies of SARS-CoV-2-specific CD4<sup>+</sup> and CD8<sup>+</sup> T cells that produced  
149 IFN- $\gamma$  or TNF- $\alpha$  compared to the RC cohort, while frequencies of IL-2-producing CD4<sup>+</sup> SARS-  
150 CoV-2-specific T cells also trended higher (Fig. 2b-g). There was a 2.9- and 5.2-fold increased  
151 frequency of CD4<sup>+</sup> and CD8<sup>+</sup> SARS-CoV-2-specific T cells producing IFN- $\gamma$  in PASC participants  
152 compared to RC participants (Fig. 2b-c). The differences in the frequencies of TNF- $\alpha$ -producing  
153 CD4<sup>+</sup> and CD8<sup>+</sup> T cells in PASC participants compared to RC participants were even greater (6.9-  
154 and 34-fold, respectively) (Fig. 2d-e). We chose to separate pulmonary PASC participants by prior  
155 hospitalization status to determine if this factor was associated with the frequency of virus-specific  
156 T cells. The same significant differences were observed when comparing only PASC-NH and RC  
157 participants and no significant differences were observed between PASC-NH and PASC-H groups  
158 (Fig. 2b-g). Stratification analyses for age, comorbidities and time of sample collection showed no  
159 significant differences within the RC or pulmonary PASC cohorts (S1 and S2 Fig).

160

161 Next, we individually assessed IFN- $\gamma$ - and TNF- $\alpha$ -producing SARS-CoV-2-specific T cell  
162 frequencies as these cytokines had the most significant differences overall. The frequency of IFN-  
163  $\gamma$ -producing, S-specific CD4<sup>+</sup> T cells was significantly higher in those with pulmonary PASC as  
164 compared to RC participants (median, range; PASC: 0.23%, 0-7.63%; RC: 0.075%, 0-0.26%:  
165 P=0.0098) (Fig. 3a). No significant differences were noted in the frequency of SARS-CoV-2 N-  
166 and M-specific CD4<sup>+</sup> T cells producing IFN- $\gamma$  in PASC and RC participants (Fig. 3a). Similar  
167 findings were seen for IFN- $\gamma$  expression in CD8<sup>+</sup> T cells between PASC and RC cohorts and again  
168 no difference was observed comparing the PASC-NH and PASC-H groups (Fig. 3b). Again, there

169 were no significant differences based on age, time of sample collection or comorbidities for IFN-  
170  $\gamma$ -producing SARS-CoV-2 (S1 and S2 Fig).

171  
172 PASC participants had significantly higher frequencies of TNF- $\alpha$ -producing SARS-CoV-2 S- and  
173 N-specific CD4<sup>+</sup> T cells, (P=0.0015 and P=0.0033, respectively) (Fig. 3c) and significantly  
174 increased frequencies of TNF- $\alpha$ -producing CD8<sup>+</sup> T cells in response to all three SARS-CoV-2  
175 proteins (Fig. 3d) compared to RC participants. Approximately 50% of CD4<sup>+</sup> and CD8<sup>+</sup> T cells  
176 from PASC participants produced TNF- $\alpha$  in response to all 3 SARS-CoV-2 proteins, whereas these  
177 percentages were 33% and 13%, respectively in RC participants. Only one PASC participant had  
178 no detectable CD4<sup>+</sup> T cell cytokine response to any SARS-CoV-2 protein – this individual did  
179 have CD8<sup>+</sup> T cell cytokine responses – while 5 RC participants had no detectable responses in  
180 either CD4<sup>+</sup> or CD8<sup>+</sup> T cells. Interestingly, female PASC participants had significantly higher total  
181 (P=0.0015) and S-specific (P=0.045) CD8<sup>+</sup> T cell responses compared to male participants with  
182 PASC (Fig. 3e-f).

183  
184 **SARS-CoV-2-specific T cells in PASC are less polyfunctional than in RC and exhibit recent**  
185 **proliferation**

186 Next, we compared the expression of cytokines and phenotypic markers on SARS-CoV-2-specific  
187 T cells in pulmonary PASC and RC participants. It has been established that T cell immunity to  
188 SARS-CoV-2 wanes rapidly after resolution of infection and symptoms(24). As confirmation of  
189 waning immunity, we examined SARS-CoV-2-specific T cell frequencies in 2 RC participants  
190 who provided blood at 2- and 30-weeks post resolution of symptoms. As expected, their T cell  
191 responses decreased over time (S2 Fig). Based on these data, we collected blood from RC

192 participants at early time points after resolution of infection to ensure that detectable frequencies  
193 of SARS-CoV-2-specific T cells were present. Thus, we were able to interrogate differences in T  
194 cell phenotype and function in both PASC and RC participants.

195

196 We assessed the cytokine-production profiles of PASC and RC participants utilizing simplified  
197 presentation of incredibly complex evaluations (SPICE)(25). The SPICE analysis revealed the  
198 majority of SARS-CoV-2-specific T cells in individuals with pulmonary PASC only produce one  
199 of the three cytokines tested with TNF- $\alpha$  dominating the virus-specific CD4<sup>+</sup> T cell response and  
200 IFN- $\gamma$  dominating the CD8<sup>+</sup> T cell response, while RC participants tended to produce multiple  
201 cytokines, indicating the T cell cytokine response is more restricted PASC compared to RC. A  
202 deeper analysis revealed significant differences in the distribution of CD4<sup>+</sup> T cell cytokine  
203 expression in response to N and M proteins when comparing PASC and RC participants (P=0.012  
204 and P=0.046, respectively) (Fig. 4). The proportion of N-specific CD4<sup>+</sup> T cells producing both  
205 IFN- $\gamma$  and IL-2 was significantly higher in RC participants compared to PASC participants  
206 (P=0.017) while the proportion of TNF- $\alpha$ - and IL-2-producing N-specific CD4<sup>+</sup> T cells was higher  
207 in pulmonary PASC participants (P=0.024). For CD8<sup>+</sup> T cells, the overall proportions of cytokine  
208 co-expression were also significantly different between PASC and RC cohorts for S- and N-  
209 specific T cells (P=0.012 and P=0.008, respectively) and although at an overall low frequency, the  
210 proportion of TNF- $\alpha$ - and IL-2-producing N-specific CD8<sup>+</sup> T cells was also higher in PASC  
211 compared to RC participants (Fig. 4). Interestingly, the proportion of IFN- $\gamma$ - and TNF- $\alpha$ -producing  
212 S-specific CD8<sup>+</sup> T cells was significantly greater in RC compared to PASC (P=0.026), while the  
213 proportion of CD8<sup>+</sup> T cells secreting this combination of cytokines trended higher in PASC in  
214 response to N- and M- peptide pools.

215

216 We then assessed markers of T cell maturation (CD27 and CD45RA), exhaustion (PD-1) and  
217 proliferative capacity (Ki-67) on total (S3 Fig) and virus-specific (Fig. 5) T cells from PASC and  
218 RC participants. No differences were seen in the frequency of naïve, effector memory or terminally  
219 differentiated effector memory for total CD4<sup>+</sup> or CD8<sup>+</sup> T cells between the two groups; however,  
220 there was an increased frequency of central memory (CD27<sup>+</sup> CD45RA<sup>-</sup>) CD4<sup>+</sup> T cells in the blood  
221 of PASC participants (PASC median: 43%, RC median: 35%; P=0.04) (S3 Fig). Also, no  
222 significant differences in Ki-67 or PD-1 expression were seen. Regarding SARS-CoV-2-specific  
223 T cells, maturation and exhaustion markers were not significantly different between PASC and RC  
224 participants (data not shown). However, within the pulmonary PASC cohort, Ki-67 expression in  
225 SARS-CoV-2-specific TNF- $\alpha$ -producing CD4<sup>+</sup> and CD8<sup>+</sup> T cells was significantly higher than in  
226 cells expressing either IFN- $\gamma$  or IL-2 (Fig. 5). For example, in response to M protein, the number  
227 of TNF- $\alpha$ -producing cells expressing Ki-67 was 2.6-fold higher for CD4<sup>+</sup> T cells (P<0.0001) and  
228 3.2-fold higher for CD8<sup>+</sup> T cells (P=0.0059) compared to IFN- $\gamma$ -producing T cells (Fig. 5). TNF-  
229  $\alpha$ -producing T cells exhibited significantly higher frequencies of Ki-67 than IFN- $\gamma$ -producing T  
230 cells for both CD4<sup>+</sup> and CD8<sup>+</sup> T cell subsets, and Ki-67 was higher on TNF- $\alpha$ -producing T cells  
231 for all conditions, except for S-specific CD4<sup>+</sup> T cells when compared to the frequency of Ki-67 on  
232 IL-2-producing T cells (Fig. 5). For S-specific CD8<sup>+</sup> and N-specific CD4<sup>+</sup> T cells the frequency  
233 of Ki-67 on IL-2-producing T cells was somewhat higher than that of IFN- $\gamma$ -producing T cells  
234 (P=0.03 and P=0.04, respectively) (Fig. 5).

235

236 **Plasma IL-6 levels in pulmonary PASC correlated with the frequency of SARS-CoV-2-**  
237 **specific T cells**

238 We measured plasma IL-6 and CRP in participants to characterize systemic inflammation in  
239 pulmonary PASC and correlate these markers with the frequency of virus-specific T cells.  
240 Assessed independently of hospitalization status, both IL-6 and CRP were significantly elevated  
241 compared to the RC cohort: IL-6 (PASC median=2.9 pg/mL, RC median=1.7 pg/mL, P=0.025);  
242 CRP (PASC median=4.4 mg/L, RC median=1.76 mg/L, P=0.0044) (Fig. 6a-b). No significant  
243 correlations were found between plasma IL-6 or CRP levels and age or number of pre-existing  
244 conditions for all participants or each cohort separately (data not shown). No significant difference  
245 in plasma IL-6 between PASC-H and PASC-NH were found and both were significantly elevated  
246 compared to RC (data not shown). There was also no difference in IL-6 comparing female and  
247 male PASC participants (Fig. 6b). Assessing CRP in PASC-NH participants, this group trended  
248 higher than RC participants (PASC-NH median=3.10 mg/L, RC median=1.76 mg/L, P=0.074),  
249 whereas there was a significant difference between PASC-H and RC (PASC-H median=5.74  
250 mg/L, RC median=1.76 mg/L, P=0.004). Of note, PASC-H participants were significantly higher  
251 compared to PASC-NH (P=0.025) (data not shown). Male PASC participants also had  
252 significantly higher plasma CRP compared to female PASC participants (P=0.028) (Fig. 6d). This  
253 observation suggests that elevated plasma CRP in pulmonary PASC is likely related to initial  
254 disease severity, known to be associated with male sex(26), while IL-6 elevation is specific to  
255 pulmonary PASC regardless of disease severity or gender. Stratification analyses show no  
256 significant differences within the PASC or RC cohorts based on age or pre-existing conditions,  
257 although CRP did trend higher in those with pre-existing conditions (S4 Fig). No correlations  
258 between duration of symptoms, time from onset to sample collection or age with IL-6 or CRP were  
259 found (data not shown). We also compared IgG and IgA antibody levels to the S1 region of the  
260 spike protein and found no differences when comparing all PASC or PASC-NH participants with

261 the RC cohort (IgG: P=0.45, IgA: P=0.43): however, PASC-H participants had significantly higher  
262 IgG and IgA antibody levels than PASC-NH participants (IgG: P=0.007, IgA: P=0.007) (S4 Fig).  
263  
264 We next explored the relationship between the frequencies of SARS-CoV-2-specific CD4<sup>+</sup> and  
265 CD8<sup>+</sup> T cells with IL-6 and CRP. We identified significant positive correlations between total, S-  
266 specific, and N-specific frequencies of TNF- $\alpha$ -producing SARS-CoV-2-specific CD8<sup>+</sup> (r=0.55;  
267 P=0.0064, r=0.47; P=0.019, and r=0.42; P=0.032 respectively) T cells and plasma IL-6 in PASC  
268 participants (Fig. 6e). These correlations were not observed in the RC cohort (Fig. 6f). No  
269 significant correlations between plasma CRP and the frequency of SARS-CoV-2-specific T cells  
270 in either PASC or RC cohorts were observed (data not shown).

271

### 272 **SARS-CoV-2-specific T cell frequencies correlate with decreased lung function**

273 A subset of pulmonary PASC participants (n=8) had pulmonary function tests (PFTs) performed  
274 during their period of prolonged respiratory symptoms as part of their standard of care. None of  
275 these participants reported pre-existing pulmonary conditions prior to infection with SARS-CoV-  
276 2. PFTs were performed between 45 and 315 days after symptom onset (median=187 days). We  
277 correlated the frequencies of SARS-CoV-2-specific T cells with the following variables: percent  
278 predicted forced vital capacity (%FVC), absolute and percent predicted forced expiratory volume  
279 during the 1<sup>st</sup> second (FEV<sub>1</sub>, %FEV<sub>1</sub> respectively), FEV<sub>1</sub>/FVC, total lung capacity percent  
280 predicted (%TLC), single-breath diffusing capacity of the lung for CO percent predicted  
281 (%DLCO\_SB), and diffusing capacity of the lung per alveolar volume percent predicted  
282 (%DLCO/VA). As shown in Fig. 7a and 7b, the total frequencies of IFN- $\gamma$ -producing SARS-CoV-  
283 2-specific CD4<sup>+</sup> and CD8<sup>+</sup> T cells negatively correlated with %FEV<sub>1</sub> (r=-0.81, P=0.011; r=-0.9,

284 P=0.007, respectively). Similar findings were seen between TNF- $\alpha$ -producing CD4<sup>+</sup> and CD8<sup>+</sup> T  
285 cells and %FEV<sub>1</sub> (Fig. 7c-d). We then compared the frequency of SARS-CoV-2-specific T cells  
286 with the duration of prolonged dyspnea experienced by 80% (n=16) of our pulmonary PASC  
287 participants. From this analysis, we identified positive correlations between dyspnea duration and  
288 frequencies of IFN- $\gamma$ -producing SARS-CoV-2 total (r=0.49, P=0.02) and S-specific (r=0.55,  
289 P=0.015) CD8<sup>+</sup> T cells (Fig 7e-f). There was also a positive correlation between TNF- $\alpha$ -producing  
290 SARS-CoV-2 S-specific (r=0.45, P=0.036) CD8<sup>+</sup> T cells and dyspnea duration, and a negative  
291 correlation between total CD4<sup>+</sup> IL-2-producing T cells and dyspnea duration (r=-0.61, P=0.006)  
292 (Fig g-h).  
293

294 **Discussion**

295 As the number of SARS-CoV-2 infections accumulate worldwide, PASC is likely to remain a  
296 significant health concern for the foreseeable future. We examined SARS-CoV-2-specific  
297 immunity in convalescent COVID-19 patients recruited prior to the appearance of the B.1.617.2  
298 “Delta” and B.1.1.529 “Omicron” variants(23). Pulmonary PASC participants with a defined set  
299 of prolonged respiratory symptoms had dramatically higher frequencies of SARS-CoV-2-specific  
300 T cells in blood compared to participants who had recovered from infection without persistent  
301 COVID-19 symptoms. We also found that levels of key plasma inflammatory markers (IL-6 and  
302 CRP) were significantly elevated in individuals with ongoing pulmonary PASC and associated  
303 with the frequency of SARS-CoV-2-specific T cells. The frequency of SARS-CoV-2-specific T  
304 cells in pulmonary PASC participants correlated with reduced lung function and duration of  
305 dyspnea, linking the presence of these anti-viral T cells to lung dysfunction. Taken together, these  
306 data provide mechanistic insight into the immunopathogenesis of pulmonary PASC.

307

308 The most striking feature of PASC is the significantly elevated frequency of SARS-CoV-2-specific  
309 TNF- $\alpha$ -producing CD8<sup>+</sup> T cells. This increased frequency could be detected in response to peptide  
310 pools of all the viral structural proteins in comparison to the RC cohort. Interestingly, these T cells  
311 were also significantly higher in female PASC participants compared to males, which may  
312 contribute to the higher prevalence of PASC in women(1). TNF- $\alpha$ -producing CD8<sup>+</sup> T cells also  
313 expressed the highest levels of Ki-67, indicating recent activation and proliferation. Because the  
314 half-life of SARS-CoV-2-specific T cells is between three and five months(24) and most of our  
315 PASC participants donated blood over 6 months from symptom onset, it suggests these cells are  
316 maintained by viral antigen. The presence of persistent viral reservoirs of SARS-CoV-2 has been



317 proposed as a possible explanation of PASC pathophysiology(27). Studies in macaques and  
318 humans demonstrated viral replication can persist months after initial infection in multiple organ  
319 systems(28-31) and viral presence in cerebrospinal fluid has been observed in neurological  
320 PASC(32). Alternatively, damage resulting from severe disease during acute infection has also  
321 been proposed as a cause of PASC(27). However, our results don't support this idea since sixty  
322 percent of our pulmonary PASC cohort initially experienced mild disease(33), yet still developed  
323 PASC. Furthermore, there was no difference in the frequency of SARS-CoV-2-specific T cells  
324 when hospitalized and non-hospitalized PASC participants were compared. Thus, our findings that  
325 pulmonary PASC participants have elevated levels of SARS-CoV-2-specific T cells months after  
326 initial infection suggest ongoing viral replication that is maintaining the pool of inflammatory T  
327 cells.

328  
329 The role of T cells in chronic inflammatory conditions is well documented and characterized by  
330 the production of TNF- $\alpha$  and other proinflammatory cytokines(34), so we examined the  
331 inflammatory markers CRP and IL-6. Both are closely associated with disease severity during  
332 acute SARS-CoV-2 infection(35), although previously, no differences in IL-6 levels were found  
333 in non-specific PASC when compared to those with resolved infection(36). In contrast, we found  
334 that CRP and IL-6 were elevated in pulmonary PASC participants. Levels of CRP in hospitalized  
335 PASC participants were significantly higher compared to non-hospitalized PASC participants  
336 suggesting prolonged CRP elevation is more strongly associated with initial severity of disease  
337 than pulmonary PASC. Elevated IL-6, however, was not different between PASC-H and PASC-  
338 NH participants after controlling for sex, age or comorbidities. IL-6 is directly associated with  
339 inflammatory lung conditions(37) and targeting IL-6 pathways can effectively treat a variety of

340 inflammatory conditions and decrease mortality in severe COVID-19 cases(38-41). Interestingly,  
341 IL-6 levels strongly associated with the frequencies of SARS-CoV-2-specific CD8<sup>+</sup> T cells which  
342 have been shown in other diseases to directly impact tissue-specific monocyte and macrophage  
343 production of IL-6 and TNF- $\alpha$  and contribute to feedback loops for innate immune cell recruitment  
344 and activation(42, 43) which likely contributes to prolonged respiratory symptoms.

345

346 To further understand the role of SARS-CoV-2-specific T cells in pulmonary PASC, we evaluated  
347 their associations with lung function. TNF- $\alpha$  impacts asthma progression(44, 45) and chronic  
348 obstructive pulmonary disease is associated with IFN- $\gamma$ -producing T cells(46). In severe COVID-  
349 19, decreased pulmonary function is connected to elevated levels of systemic IFN- $\gamma$  and TNF- $\alpha$ ,  
350 and analysis of immune cells isolated from bronchoalveolar lavage fluid suggests T cell  
351 dysfunction potentially exacerbates tissue damage in severe cases(47-49). These studies indicate  
352 a strong connection between T cell cytokine production and lung function, particularly in SARS-  
353 CoV-2 infections. However, this association had not been examined in pulmonary PASC. Here,  
354 we found that elevated frequencies of IFN- $\gamma$ - and TNF- $\alpha$ -producing SARS-CoV-2-specific T cells  
355 were positively associated with decreased lung function in pulmonary PASC. We also found the  
356 duration of dyspnea correlated with increased frequencies of CD8<sup>+</sup> IFN- $\gamma$ - and TNF- $\alpha$ -producing  
357 SARS-CoV-2-specific T cells and decreased levels of CD4<sup>+</sup> IL-2 producing T cells. Similar to the  
358 effects of systemic cytokines and T cell expression of inflammatory cytokines in other pulmonary  
359 conditions, our findings suggest that the presence of persistently activated SARS-CoV-2-specific  
360 T cells in PASC likely contributes to lung dysfunction.

361

362 Collectively, our findings demonstrate that elevated frequencies of SARS-CoV-2-specific T cells  
363 are associated with systemic inflammation and decreased lung function in pulmonary PASC. We  
364 observed a striking difference in the frequency of activated and dividing T cells as well as  
365 correlations between SARS-CoV-2-specific T cell frequencies and levels of plasma IL-6. Most  
366 importantly, we found a strong association between the frequency of SARS-CoV-2-specific T cells  
367 and the duration of respiratory symptoms and lung function. While this study examines the  
368 responses after infection with one of the early strains of SARS-CoV-2, the characteristics of more  
369 recent variants may increase the prevalence of PASC via the same mechanisms supported by our  
370 findings(12). Together, these findings suggest pulmonary PASC is in part driven by inflammatory  
371 cytokines produced by activated virus-specific T cells, that are likely maintained by persistent  
372 virus and contribute to systemic inflammation and prolonged disease morbidity.

## 373 **Materials and Methods**

### 374 **Study participants and sample collection**

375 Adult study participants were recruited from the Denver, Colorado metropolitan area via  
376 community flyers, and from the Anschutz Medical Campus Infectious Disease and Pulmonology  
377 PASC UHealth outpatient clinics between July 2020 and April 2021, prior to detection of the  
378 Delta or Omicron variants in Colorado(23). Information regarding symptom severity and duration  
379 was collected from all participants upon enrollment. 50 mL of blood was collected from study  
380 volunteers in sodium heparin tubes (BD, Vacutainer), and plasma and peripheral blood  
381 mononuclear cells (PBMCs) were isolated as described previously(50). None of the participants  
382 were vaccinated against SARS-CoV-2 prior to sample collection. Participants for this study were  
383 only included if they had a documented positive SARS-CoV-2 PCR nasal swab during acute  
384 infection and separated into PASC and RC cohorts based on the Center for Disease Control and  
385 Prevention definition of PASC(1, 5). We defined pulmonary PASC as having two or more  
386 symptoms with a duration longer than 4 weeks from onset or hospital discharge, tussis, or dyspnea  
387 present during acute disease and prolonged tussis, dyspnea, and/or fatigue. Demographics of the  
388 study population are shown in Table 1 and S1 Table.

389

### 390 **Cytokine and antigen ELISAs**

391 Anti-SARS-CoV-2 Spike S1 IgG and IgA antigens, IL-6 and C-reactive protein (CRP) were  
392 assessed using the following ELISA kits per manufacturer protocols: (IgG; Euroimmun - EI2606-  
393 9601G, IgA; Euroimmun - EI2606-9601A, IL-6; Invitrogen - 88-7066.22, CRP; Millipore Sigma  
394 - RAB0096-1KT). In brief, plasma and standards were diluted per manufacturer's protocol in  
395 sample diluent and, added to pre-coated microplate wells. Following incubation of the wells with

396 biotinylated detection antibody, HRP conjugate, substrate reagent, and stop solution, the plates  
397 were read at 450nm.

398

### 399 **T cell stimulation and immunofluorescent staining**

400 The frequency of antigen-specific, cytokine-secreting T cells in blood was determined by  
401 intracellular cytokine staining, with minor modifications to our previously published protocol(51).

402 In brief, PBMCs ( $2-4 \times 10^6$  cells) were cultured 5 ml polypropylene tubes in RPMI medium  
403 containing 10% human serum and anti-CD28 and anti-CD49d mAbs (each at 1  $\mu\text{g/ml}$ ) (S2 Table).

404 Cells were stimulated under the following conditions: peptide arrays of SARS-CoV-2 spike (S)  
405 glycoprotein, nucleocapsid (N) protein, membrane (M) protein, (5  $\mu\text{g/ml}$  final concentration of

406 each peptide; BEI Resources from USA-WA1/2020 strain, NR-52402, NR-52404, NR-52403),  
407 combined phorbol 12-myristate 13-acetate (PMA) and ionomycin (25  $\mu\text{g/ml}$  and 32.5  $\mu\text{g/ml}$ ,

408 respectively; Sigma) or medium alone. S and N arrays were 17- or 13-mer peptides with 10 amino  
409 acid overlap, and the M array consisted of 17- or 12-mer peptides with 10 amino acid overlap.

410 Cells were incubated for 6 hours at 37°C in a humidified 5% CO<sub>2</sub> atmosphere and a 5-degree slant  
411 with 1  $\mu\text{g/ml}$  Golgi Plug added after 4 hours. LIVE/DEAD™ Fixable Aqua Dead Cell Stain Kit

412 (Invitrogen L34957) was used per the manufacturer's protocol after washing. Cells were surfaced

413 stained with the following mAbs: anti-CD3, anti-CD4, anti-CD8, anti-CD27, anti-CD45RA, and

414 anti-PD-1 for 30 min at 4°C. Cells were washed and stored in a fix permeabilization buffer

415 (eBioscience, 421403) overnight at 4°C. Cells were washed in permeabilization buffer and stained

416 with anti-IFN- $\gamma$ , anti-IL-2, anti-Ki-67, and anti-TNF- $\alpha$  mAbs for 120 min at 4°C, washed, and

417 fixed with 1% formaldehyde. Fluorescence<sup>-1</sup> (FMO) controls were used in anti-PD-1, anti-CD27

418 and anti-CD45RA staining. Full information on staining fluorophores are provided in S2 Table.

## 419 **Flow cytometry**

420 Cells were analyzed using a LSRII flow cytometer (BD Immunocytometry Systems). At least 1  
421 million events were collected for each tested condition. Antibody capture beads (BD Biosciences)  
422 were used to perform electronic compensation. Beads were stained separately with individual  
423 mAbs used in the test sample. Data were analyzed using Diva software (BD). Lymphocytes were  
424 gated by their forward and side scatter profile. Live and CD3<sup>+</sup> cells were selected, and expression  
425 of CD4 was analyzed in a bivariate dot plot with CD8 to exclude CD4/CD8 double positive T  
426 cells. Bi-exponential scaling was used in all dot plots. Expression of CD27, CD45RA, PD-1 and  
427 Ki-67 was examined on cytokine-producing cells with at least 100 events to ensure an adequate  
428 number of events for analysis(52, 53). FMO controls were used to set gates for determining the  
429 percentage of PD-1-expressing T cells. To ensure accuracy and precision of the measurements  
430 taken from day-to-day, quality control was performed on the LSRII daily using the Cytometer  
431 Setup & Tracking (CS&T) feature of the BD FACSDiva software. This program uses standardized  
432 CS&T beads (BD Biosciences) to determine voltages, laser delays, and area scaling to track these  
433 settings over time. A manual quality control (QC) using rainbow beads was also performed daily  
434 to verify the laser delay and area scaling determined by CS&T.

435

## 436 **Statistics**

437 Statistical analyses were performed using GraphPad-Prism (Graphpad, San Diego, CA). The  
438 Mann-Whitney *U* test or Wilcoxon's matched pairs test were utilized to determine significance of  
439 differences between groups. Correlations were calculated using the nonparametric Spearman test.  
440 P values of <0.05 were considered statistically significant. To visualize and evaluate differences  
441 in expression of multiple cytokines between the PASC and RC cohorts, simplified presentation of

442 incredibly complex evaluations (SPICE) analysis was utilized as well as permutation tests with  
443 10,000 iterations and student T tests for statistical significance where  $P < 0.05$  were considered  
444 statistically significant. Both of these student T and permutation tests of the SPICE analysis were  
445 corrected for 21 concurrent comparisons(54).

446

#### 447 **Study approval**

448 This study was approved by the Colorado Multiple Institutional Review Board (COMIRB# 20-  
449 1219) at the University of Colorado Anschutz Medical Campus. All participants provided written  
450 informed consent prior to any study procedures.

451

452 **Acknowledgment**

453 We would like to thank the individuals and organizations who generously shared their time,  
454 experience, and materials for the purposes of this project particularly those with PASC who  
455 made this possible.

456

457 **Disclosures**

458 The authors have declared that no conflict of interest exists.

459

460



461 **References**

- 462 1. Sudre, C. H., B. Murray, T. Varsavsky, M. S. Graham, R. S. Penfold, R. C. Bowyer, J. C.  
463 Pujol, K. Klaser, M. Antonelli, L. S. Canas, E. Molteni, M. Modat, M. Jorge Cardoso, A.  
464 May, S. Ganesh, R. Davies, L. H. Nguyen, D. A. Drew, C. M. Astley, A. D. Joshi, J.  
465 Merino, N. Tsereteli, T. Fall, M. F. Gomez, E. L. Duncan, C. Menni, F. M. K. Williams,  
466 P. W. Franks, A. T. Chan, J. Wolf, S. Ourselin, T. Spector, and C. J. Steves. 2021.  
467 Attributes and predictors of long COVID. *Nature Medicine* 27: 626-631.
- 468 2. Higgins, V., D. Sohaei, E. P. Diamandis, and I. Prassas. 2020. COVID-19: from an acute  
469 to chronic disease? Potential long-term health consequences. *Critical Reviews in Clinical*  
470 *Laboratory Sciences*: 1-23.
- 471 3. Yong, S. J. 2021. Persistent Brainstem Dysfunction in Long-COVID: A Hypothesis. *ACS*  
472 *Chemical Neuroscience* 12: 573-580.
- 473 4. Wang, F., R. M. Kream, and G. B. Stefano. 2020. Long-Term Respiratory and  
474 Neurological Sequelae of COVID-19. *Medical Science Monitor* 26.
- 475 5. Carfi, A., R. Bernabei, and F. Landi. 2020. Persistent Symptoms in Patients After Acute  
476 COVID-19. *JAMA* 324: 603.
- 477 6. Tenforde, M., I. N. Investigators, and C. C.-R. Team. 2020. Symptom Duration and Risk  
478 Factors for Delayed Return to Usual Health Among Outpatients with COVID-19 in a  
479 Multistate Health Care Systems Network — United States, March–June 2020. In  
480 *Morbidity and Mortality Weekly Report MMWR*. CDC. 993-998.
- 481 7. Augustin, M., P. Schommers, M. Stecher, F. Dewald, L. Gieselmann, H. Gruell, C. Horn,  
482 K. Vanshylla, V. D. Cristanziano, L. Osebold, M. Roventa, T. Riaz, N. Tschernoster, J.  
483 Altmueller, L. Rose, S. Salomon, V. Priesner, J. C. Luers, C. Albus, S. Rosenkranz, B.  
484 Gathof, G. Fatkenheuer, M. Hallek, F. Klein, I. Suarez, and C. Lehmann. 2021. Post-  
485 COVID syndrome in non-hospitalised patients with COVID-19: a longitudinal  
486 prospective cohort study. *Lancet Reg Health Eur* 6: 100122.
- 487 8. Torres-Castro, R., L. Vasconcello-Castillo, X. Alsina-Restoy, L. Solis-Navarro, F.  
488 Burgos, H. Puppo, and J. Vilaro. 2021. Respiratory function in patients post-infection by  
489 COVID-19: a systematic review and meta-analysis. *Pulmonology* 27: 328-337.
- 490 9. Townsend, L., J. Dowds, K. O'Brien, G. Sheill, A. H. Dyer, B. O'Kelly, J. P. Hynes, A.  
491 Mooney, J. Dunne, C. Ni Cheallaigh, C. O'Farrelly, N. M. Bourke, N. Conlon, I. Martin-  
492 Loeches, C. Bergin, P. Nadarajan, and C. Bannan. 2021. Persistent Poor Health after  
493 COVID-19 Is Not Associated with Respiratory Complications or Initial Disease Severity.  
494 *Annals of the American Thoracic Society* 18: 997-1003.
- 495 10. Butt, A. A., S. R. Dargham, H. Chemaitelly, A. Al Khal, P. Tang, M. R. Hasan, P. V.  
496 Coyle, A. G. Thomas, A. M. Borham, E. G. Concepcion, A. H. Kaleeckal, A. N. Latif, R.  
497 Bertollini, A.-B. Abou-Samra, and L. J. Abu-Raddad. 2021. Severity of Illness in Persons  
498 Infected With the SARS-CoV-2 Delta Variant vs Beta Variant in Qatar. *JAMA Internal*  
499 *Medicine*.
- 500 11. Meo, S. A., A. S. Meo, F. F. Al-Jassir, and D. C. Klonoff. 2021. Omicron SARS-CoV-2  
501 new variant: global prevalence and biological and clinical characteristics. *Eur Rev Med*  
502 *Pharmacol Sci* 25: 8012-8018.
- 503 12. Proal, A. D., and M. B. VanElzakker. 2021. Long COVID or Post-acute Sequelae of  
504 COVID-19 (PASC): An Overview of Biological Factors That May Contribute to  
505 Persistent Symptoms. *Front Microbiol* 12: 698169.

- 506 13. Doykov, I., J. Hällqvist, K. C. Gilmour, L. Grandjean, K. Mills, and W. E. Heywood.  
507 2021. ‘The long tail of Covid-19’ - The detection of a prolonged inflammatory response  
508 after a SARS-CoV-2 infection in asymptomatic and mildly affected patients.  
509 *F1000Research* 9: 1349.
- 510 14. Files, J. K., S. Sarkar, T. R. Fram, S. Boppana, S. Sterrett, K. Qin, A. Bansal, D. M.  
511 Long, S. Sabbaj, J. J. Kobie, P. A. Goepfert, and N. Erdmann. 2021. Duration of post-  
512 COVID-19 symptoms are associated with sustained SARS-CoV-2 specific immune  
513 responses. *JCI Insight*.
- 514 15. Sette, A., and S. Crotty. 2021. Adaptive immunity to SARS-CoV-2 and COVID-19. *Cell*  
515 184: 861-880.
- 516 16. Rha, M. S., H. W. Jeong, J. H. Ko, S. J. Choi, I. H. Seo, J. S. Lee, M. Sa, A. R. Kim, E. J.  
517 Joo, J. Y. Ahn, J. H. Kim, K. H. Song, E. S. Kim, D. H. Oh, M. Y. Ahn, H. K. Choi, J. H.  
518 Jeon, J. P. Choi, H. B. Kim, Y. K. Kim, S. H. Park, W. S. Choi, J. Y. Choi, K. R. Peck,  
519 and E. C. Shin. 2021. PD-1-Expressing SARS-CoV-2-Specific CD8(+) T Cells Are Not  
520 Exhausted, but Functional in Patients with COVID-19. *Immunity* 54: 44-52 e43.
- 521 17. Demaret, J., G. Lefèvre, F. Vuotto, J. Trauet, A. Duhamel, J. Labreuche, P. Varlet, A.  
522 Dendooven, S. Stabler, B. Gachet, J. Bauer, B. Prevost, L. Bocket, E. K. Alidjinou, M.  
523 Lambert, C. Yelnik, B. Meresse, L. Dubuquoy, D. Launay, S. Dubucquoi, D. Montaigne,  
524 E. Woitrain, F. Maggioletto, M. Bou Saleh, I. Top, V. Elsermans, E. Jeanpierre, A. Dupont,  
525 S. Susen, T. Brousseau, J. Poissy, K. Faure, and M. Labalette. 2020. Severe  
526 SARS-CoV-2 patients develop a higher specific T-cell response. *Clinical &*  
527 *Translational Immunology* 9.
- 528 18. Sekine, T., A. Perez-Potti, O. Rivera-Ballesteros, K. Strålin, J.-B. Gorin, A. Olsson, S.  
529 Llewellyn-Lacey, H. Kamal, G. Bogdanovic, S. Muschiol, D. J. Wullimann, T.  
530 Kammann, J. Emgård, T. Parrot, E. Folkesson, O. Rooyackers, L. I. Eriksson, J.-I.  
531 Henter, A. Sönnernborg, T. Allander, J. Albert, M. Nielsen, J. Klingström, S. Gredmark-  
532 Russ, N. K. Björkström, J. K. Sandberg, D. A. Price, H.-G. Ljunggren, S. Aleman, M.  
533 Buggert, M. Akber, L. Berglin, H. Bergsten, S. Brighenti, D. Brownlie, M. Butrym, B.  
534 Chambers, P. Chen, M. C. Jeannin, J. Grip, A. C. Gomez, L. Dillner, I. D. Lozano, M.  
535 Dzidic, M. F. Tullberg, A. Färnert, H. Glans, A. Haroun-Izquierdo, E. Henriksson, L.  
536 Hertwig, S. Kalsum, E. Kokkinou, E. Kvedaraitė, M. Loreti, M. Lourda, K. Maleki, K.-J.  
537 Malmberg, N. Marquardt, C. Maucourant, J. Michaelsson, J. Mjösberg, K. Moll, J. Muva,  
538 J. Mårtensson, P. Naclér, A. Norrby-Teglund, L. P. Medina, B. Persson, L. Radler, E.  
539 Ringqvist, J. T. Sandberg, E. Sohlberg, T. Soini, M. Svensson, J. Tynell, R. Varnaite, A.  
540 V. Kries, and C. Unge. 2020. Robust T Cell Immunity in Convalescent Individuals with  
541 Asymptomatic or Mild COVID-19. *Cell* 183: 158-168.e114.
- 542 19. Meckiff, B. J., C. Ramírez-Suástegui, V. Fajardo, S. J. Chee, A. Kusnadi, H. Simon, S.  
543 Eschweiler, A. Grifoni, E. Pelosi, D. Weiskopf, A. Sette, F. Ay, G. Seumois, C. H.  
544 Ottensmeier, and P. Vijayanand. 2020. Imbalance of Regulatory and Cytotoxic SARS-  
545 CoV-2-Reactive CD4+ T Cells in COVID-19. *Cell* 183: 1340-1353.e1316.
- 546 20. Arcanjo, A., K. G. Pinto, J. Logullo, P. E. C. Leite, C. C. B. Menezes, L. Freire-De-Lima,  
547 I. Diniz-Lima, D. Decoté-Ricardo, R. N. Rodrigues-Da-Silva, C. G. Freire-De-Lima, A.  
548 A. Filardy, J. D. C. Lima-Junior, A. L. Bertho, P. M. De Luca, J. M. Granjeiro, S. P. C.  
549 Barroso, F. Conceição-Silva, W. Savino, and A. Morrot. 2021. Critically ill COVID-19  
550 patients exhibit hyperactive cytokine responses associated with effector exhausted  
551 senescent T cells in acute infection. *The Journal of Infectious Diseases*.

- 552 21. Kaneko, N., J. Boucau, H.-H. Kuo, C. Perugino, V. S. Mahajan, J. R. Farmer, H. Liu, T.  
553 J. Diefenbach, A. Piechocka-Trocha, K. Lefteri, M. T. Waring, K. R. Premo, B. D.  
554 Walker, J. Z. Li, G. Gaiha, X. G. Yu, M. Lichterfeld, R. F. Padera, and S. Pillai. 2021.  
555 Expansion of Cytotoxic CD4+ T cells in the lungs in severe COVID-19. Cold Spring  
556 Harbor Laboratory.
- 557 22. Chioh, F. W., S.-W. Fong, B. E. Young, K.-X. Wu, A. Siau, S. Krishnan, Y.-H. Chan, G.  
558 Carissimo, L. L. Teo, F. Gao, R. S. Tan, L. Zhong, A. S. Koh, S.-Y. Tan, P. A. Tambyah,  
559 L. Renia, L. F. Ng, D. C. Lye, and C. Cheung. 2021. Convalescent COVID-19 patients  
560 are susceptible to endothelial dysfunction due to persistent immune activation. *eLife* 10.  
561 23. Colorado\_State\_Tri-County\_Health\_Department. 2020. COVID-19 Variants. In *Facts*  
562 *About COVID-19*. Tri-County Health Department
- 563 24. Dan, J. M., J. Mateus, Y. Kato, K. M. Hastie, E. D. Yu, C. E. Faliti, A. Grifoni, S. I.  
564 Ramirez, S. Haupt, A. Frazier, C. Nakao, V. Rayaprolu, S. A. Rawlings, B. Peters, F.  
565 Krammer, V. Simon, E. O. Saphire, D. M. Smith, D. Weiskopf, A. Sette, and S. Crotty.  
566 2021. Immunological memory to SARS-CoV-2 assessed for up to 8 months after  
567 infection. *Science* 371: eabf4063.
- 568 25. Roederer, M., J. L. Nozzi, and M. C. Nason. 2011. SPICE: Exploration and analysis of  
569 post-cytometric complex multivariate datasets. *Cytometry Part A* 79A: 167-174.
- 570 26. Pradhan, A., and P.-E. Olsson. 2020. Sex differences in severity and mortality from  
571 COVID-19: are males more vulnerable? *Biology of Sex Differences* 11.
- 572 27. Nalbandian, A., K. Sehgal, A. Gupta, M. V. Madhavan, C. McGroder, J. S. Stevens, J. R.  
573 Cook, A. S. Nordvig, D. Shalev, T. S. Sehrawat, N. Ahluwalia, B. Bikdeli, D. Dietz, C.  
574 Der-Nigoghossian, N. Liyanage-Don, G. F. Rosner, E. J. Bernstein, S. Mohan, A. A.  
575 Beckley, D. S. Seres, T. K. Choueiri, N. Uriel, J. C. Ausiello, D. Accili, D. E. Freedberg,  
576 M. Baldwin, A. Schwartz, D. Brodie, C. K. Garcia, M. S. V. Elkind, J. M. Connors, J. P.  
577 Bilezikian, D. W. Landry, and E. Y. Wan. 2021. Post-acute COVID-19 syndrome. *Nature*  
578 *Medicine* 27: 601-615.
- 579 28. Böszörményi, K. P., M. A. Stammes, Z. C. Fagrouch, G. Kieményi-Kayere, H. Niphuis,  
580 D. Mortier, N. Van Driel, I. Nieuwenhuis, R. A. W. Vervenne, T. Haaksma, B.  
581 Ouwerling, D. Adema, R. F. Acar, E. Zuiderwijk-Sick, L. Meijer, P. Mooij, E. J.  
582 Remarque, H. Oostermeijer, G. Koopman, A. C. R. Hoste, P. Sastre, B. L. Haagmans, R.  
583 E. Bontrop, J. A. M. Langermans, W. M. Bogers, I. Kondova, E. J. Verschoor, and B. E.  
584 Verstrepen. 2021. The Post-Acute Phase of SARS-CoV-2 Infection in Two Macaque  
585 Species Is Associated with Signs of Ongoing Virus Replication and Pathology in  
586 Pulmonary and Extrapulmonary Tissues. *Viruses* 13: 1673.
- 587 29. Tavazzi, G., C. Pellegrini, M. Maurelli, M. Belliato, F. Sciutti, A. Bottazzi, P. A. Sepe, T.  
588 Resasco, R. Camporotondo, R. Bruno, F. Baldanti, S. Paolucci, S. Pelenghi, G. A. Iotti,  
589 F. Mojoli, and E. Arbustini. 2020. Myocardial localization of coronavirus in COVID-19  
590 cardiogenic shock. *European Journal of Heart Failure* 22: 911-915.
- 591 30. Diao, B., C. Wang, R. Wang, Z. Feng, J. Zhang, H. Yang, Y. Tan, H. Wang, C. Wang, L.  
592 Liu, Y. Liu, Y. Liu, G. Wang, Z. Yuan, X. Hou, L. Ren, Y. Wu, and Y. Chen. 2021.  
593 Human kidney is a target for novel severe acute respiratory syndrome coronavirus 2  
594 infection. *Nature Communications* 12.
- 595 31. Ceulemans, L. J., M. Khan, S.-J. Yoo, B. Zapiec, L. Van Gerven, J. Van Slambrouck, A.  
596 Vanstapel, D. Van Raemdonck, R. Vos, E. Wauters, J. Wauters, P. Carmeliet, and P.

- 597 Mombaerts. 2021. Persistence of SARS-CoV-2 RNA in lung tissue after mild COVID-  
598 19. *The Lancet Respiratory Medicine*.
- 599 32. Vízlayová, D., M. Sojka, S. Dobrodenková, S. Szabó, O. Bilec, M. Turzová, J. Ďurina,  
600 B. Baloghová, Z. Borbély, and M. Kršák. 2021. SARS-CoV-2 RNA in the Cerebrospinal  
601 Fluid of a Patient with Long COVID. *Therapeutic Advances in Infectious Disease* 8:  
602 204993612110485.
- 603 33. 2020. World Health Organization WHO R&D Blueprint: Novel Coronavirus COVID-19  
604 Therapeutic Trial Synopsis.
- 605 34. Cope, A. P. 2002. Studies of T-cell activation in chronic inflammation. *Arthritis*  
606 *Research* 4: S197.
- 607 35. Gong, J., H. Dong, Q.-S. Xia, Z.-Y. Huang, D.-K. Wang, Y. Zhao, W.-H. Liu, S.-H. Tu,  
608 M.-M. Zhang, Q. Wang, and F.-E. Lu. 2020. Correlation analysis between disease  
609 severity and inflammation-related parameters in patients with COVID-19: a retrospective  
610 study. *BMC Infectious Diseases* 20.
- 611 36. Peluso, M. J., A. N. Deitchman, L. Torres, N. S. Iyer, S. E. Munter, C. C. Nixon, J.  
612 Donatelli, C. Thanh, S. Takahashi, J. Hakim, K. Turcios, O. Janson, R. Hoh, V. Tai, Y.  
613 Hernandez, E. A. Fehrman, M. A. Spinelli, M. Gandhi, L. Trinh, T. Wrin, C. J.  
614 Petropoulos, F. T. Aweeka, I. Rodriguez-Barraquer, J. D. Kelly, J. N. Martin, S. G.  
615 Deeks, B. Greenhouse, R. L. Rutishauser, and T. J. Henrich. 2021. Long-term SARS-  
616 CoV-2-specific immune and inflammatory responses in individuals recovering from  
617 COVID-19 with and without post-acute symptoms. *Cell Reports* 36: 109518.
- 618 37. Rincon, M., and C. G. Irvin. 2012. Role of IL-6 in Asthma and Other Inflammatory  
619 Pulmonary Diseases. *International Journal of Biological Sciences* 8: 1281-1290.
- 620 38. Xu, X., M. Han, T. Li, W. Sun, D. Wang, B. Fu, Y. Zhou, X. Zheng, Y. Yang, X. Li, X.  
621 Zhang, A. Pan, and H. Wei. 2020. Effective treatment of severe COVID-19 patients with  
622 tocilizumab. *Proc Natl Acad Sci U S A* 117: 10970-10975.
- 623 39. Kim, J. S., J. Y. Lee, J. W. Yang, K. H. Lee, M. Effenberger, W. Szpirt, A. Kronbichler,  
624 and J. I. Shin. 2021. Immunopathogenesis and treatment of cytokine storm in COVID-19.  
625 *Theranostics* 11: 316-329.
- 626 40. Parameswaran, N., and S. Patial. 2010. Tumor necrosis factor-alpha signaling in  
627 macrophages. *Crit Rev Eukaryot Gene Expr* 20: 87-103.
- 628 41. Kang, S., T. Tanaka, M. Narazaki, and T. Kishimoto. 2019. Targeting Interleukin-6  
629 Signaling in Clinic. *Immunity* 50: 1007-1023.
- 630 42. Nishimura, S., I. Manabe, M. Nagasaki, K. Eto, H. Yamashita, M. Ohsugi, M. Otsu, K.  
631 Hara, K. Ueki, S. Sugiura, K. Yoshimura, T. Kadowaki, and R. Nagai. 2009. CD8+  
632 effector T cells contribute to macrophage recruitment and adipose tissue inflammation in  
633 obesity. *Nature Medicine* 15: 914-920.
- 634 43. Moghaddami, M., L. G. Cleland, G. Radisic, and G. Mayrhofer. 2007. Recruitment of  
635 dendritic cells and macrophages during T cell-mediated synovial inflammation. *Arthritis*  
636 *Research & Therapy* 9: R120.
- 637 44. Lykouras, D., F. Sampsonas, A. Kaparianos, K. Karkoulas, and K. Spiropoulos. 2008.  
638 Role and pharmacogenomics of TNF-alpha in asthma. *Mini Rev Med Chem* 8: 934-942.
- 639 45. Zhang, L., X. Zhang, J. Zheng, Y. Liu, J. Wang, G. Wang, H. P. Zhang, D. Y. Kang, Z.  
640 G. Peng, Y. L. Ji, L. Wang, P. G. Gibson, and G. Wang. 2019. Depressive  
641 symptom-associated IL -1 $\beta$  and TNF - $\alpha$  release correlates with impaired bronchodilator

- 642 response and neutrophilic airway inflammation in asthma. *Clinical & Experimental*  
643 *Allergy* 49: 770-780.
- 644 46. Xu, W., R. Li, and Y. Sun. 2019. Increased IFN- $\gamma$ -producing Th17/Th1 cells and their  
645 association with lung function and current smoking status in patients with chronic  
646 obstructive pulmonary disease. *BMC Pulmonary Medicine* 19.
- 647 47. Karki, R., B. R. Sharma, S. Tuladhar, E. P. Williams, L. Zalduondo, P. Samir, M. Zheng,  
648 B. Sundaram, B. Banoth, R. K. S. Malireddi, P. Schreiner, G. Neale, P. Vogel, R. Webby,  
649 C. B. Jonsson, and T.-D. Kanneganti. 2021. Synergism of TNF- $\alpha$  and IFN- $\gamma$  Triggers  
650 Inflammatory Cell Death, Tissue Damage, and Mortality in SARS-CoV-2 Infection and  
651 Cytokine Shock Syndromes. *Cell* 184: 149-168.e117.
- 652 48. Han, H., Q. Ma, C. Li, R. Liu, L. Zhao, W. Wang, P. Zhang, X. Liu, G. Gao, F. Liu, Y.  
653 Jiang, X. Cheng, C. Zhu, and Y. Xia. 2020. Profiling serum cytokines in COVID-19  
654 patients reveals IL-6 and IL-10 are disease severity predictors. *Emerging Microbes &*  
655 *Infections* 9: 1123-1130.
- 656 49. Wauters, E., P. Van Mol, A. D. Garg, S. Jansen, Y. Van Herck, L. Vanderbeke, A.  
657 Bassez, B. Boeckx, B. Malengier-Devlies, A. Timmerman, T. Van Brussel, T. Van  
658 Buyten, R. Schepers, E. Heylen, D. Dauwe, C. Doods, J. Gunst, G. Hermans, P.  
659 Meersseman, D. Testelmans, J. Yserbyt, S. Tejpar, W. De Wever, P. Matthys, J. Neyts, J.  
660 Wauters, J. Qian, and D. Lambrechts. 2021. Discriminating mild from critical COVID-19  
661 by innate and adaptive immune single-cell profiling of bronchoalveolar lavages. *Cell*  
662 *Research* 31: 272-290.
- 663 50. Neff, C. P., O. Krueger, K. Xiong, S. Arif, N. Nusbacher, J. M. Schneider, A. W.  
664 Cunningham, A. Armstrong, S. Li, M. D. McCarter, T. B. Campbell, C. A. Lozupone,  
665 and B. E. Palmer. 2018. Fecal Microbiota Composition Drives Immune Activation in  
666 HIV-infected Individuals. *EBioMedicine* 30: 192-202.
- 667 51. Palmer, B. E., E. Boritz, N. Blyveis, and C. C. Wilson. 2002. Discordance between  
668 Frequency of Human Immunodeficiency Virus Type 1 (HIV-1)-Specific Gamma  
669 Interferon-Producing CD4 + T Cells and HIV-1-Specific Lymphoproliferation in HIV-1-  
670 Infected Subjects with Active Viral Replication. *Journal of Virology* 76: 5925-5936.
- 671 52. D'Souza, M., A. P. Fontenot, D. G. Mack, C. Lozupone, S. Dillon, A. Meditz, C. C.  
672 Wilson, E. Connick, and B. E. Palmer. 2007. Programmed Death 1 Expression on HIV-  
673 Specific CD4+T Cells Is Driven by Viral Replication and Associated with T Cell  
674 Dysfunction. *The Journal of Immunology* 179: 1979-1987.
- 675 53. Kassu, A., M. D'Souza, B. P. O'Connor, E. Kelly-Mcknight, R. Akkina, A. P. Fontenot,  
676 and B. E. Palmer. 2009. Decreased 4-1BB expression on HIV-specific CD4+ T cells is  
677 associated with sustained viral replication and reduced IL-2 production. *Clinical*  
678 *Immunology* 132: 234-245.
- 679 54. Jafari, M., and N. Ansari-Pour. 2019. Why, When and How to Adjust Your P Values?  
680 *Cell J* 20: 604-607.
- 681

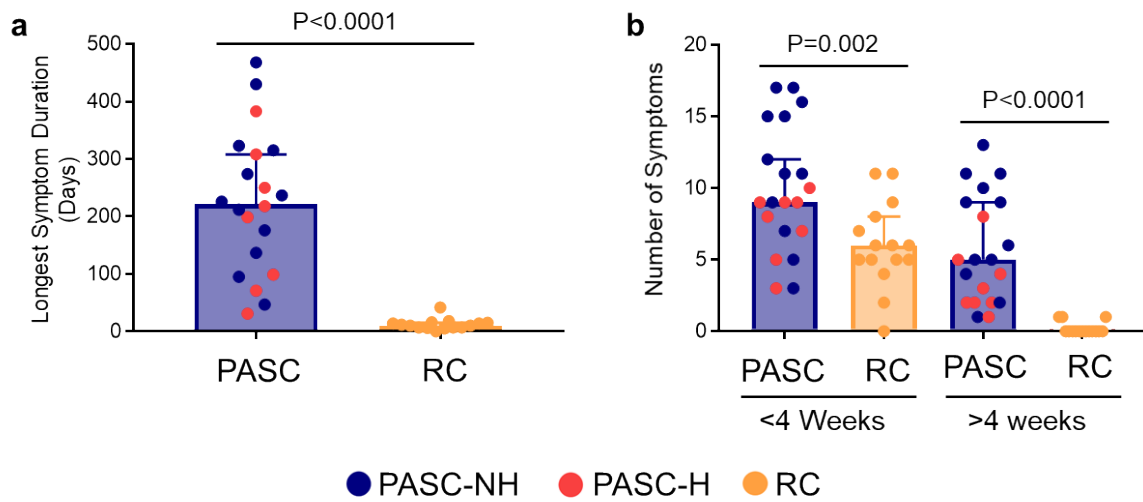

682

683 **Fig 1. Symptom characteristics of PASC and RC participants.**

684 (a) Symptom duration (days) reported in symptom questionnaires for PASC and RC participants.  
685 (b) Number of symptoms reported <4 weeks or >4 weeks from symptom onset for PASC and RC  
686 participants. For each graph, the horizontal bars represent the median of each cohort and the error  
687 bars represent the 95% confidence interval. Blue represents PASC participants not hospitalized  
688 (PASC-NH, n=12), red represents PASC-hospitalized (PASC-H, n=8) and orange represents RC  
689 participants (n=15). Mann-Whitney tests were used to determine statistical significance.  
690

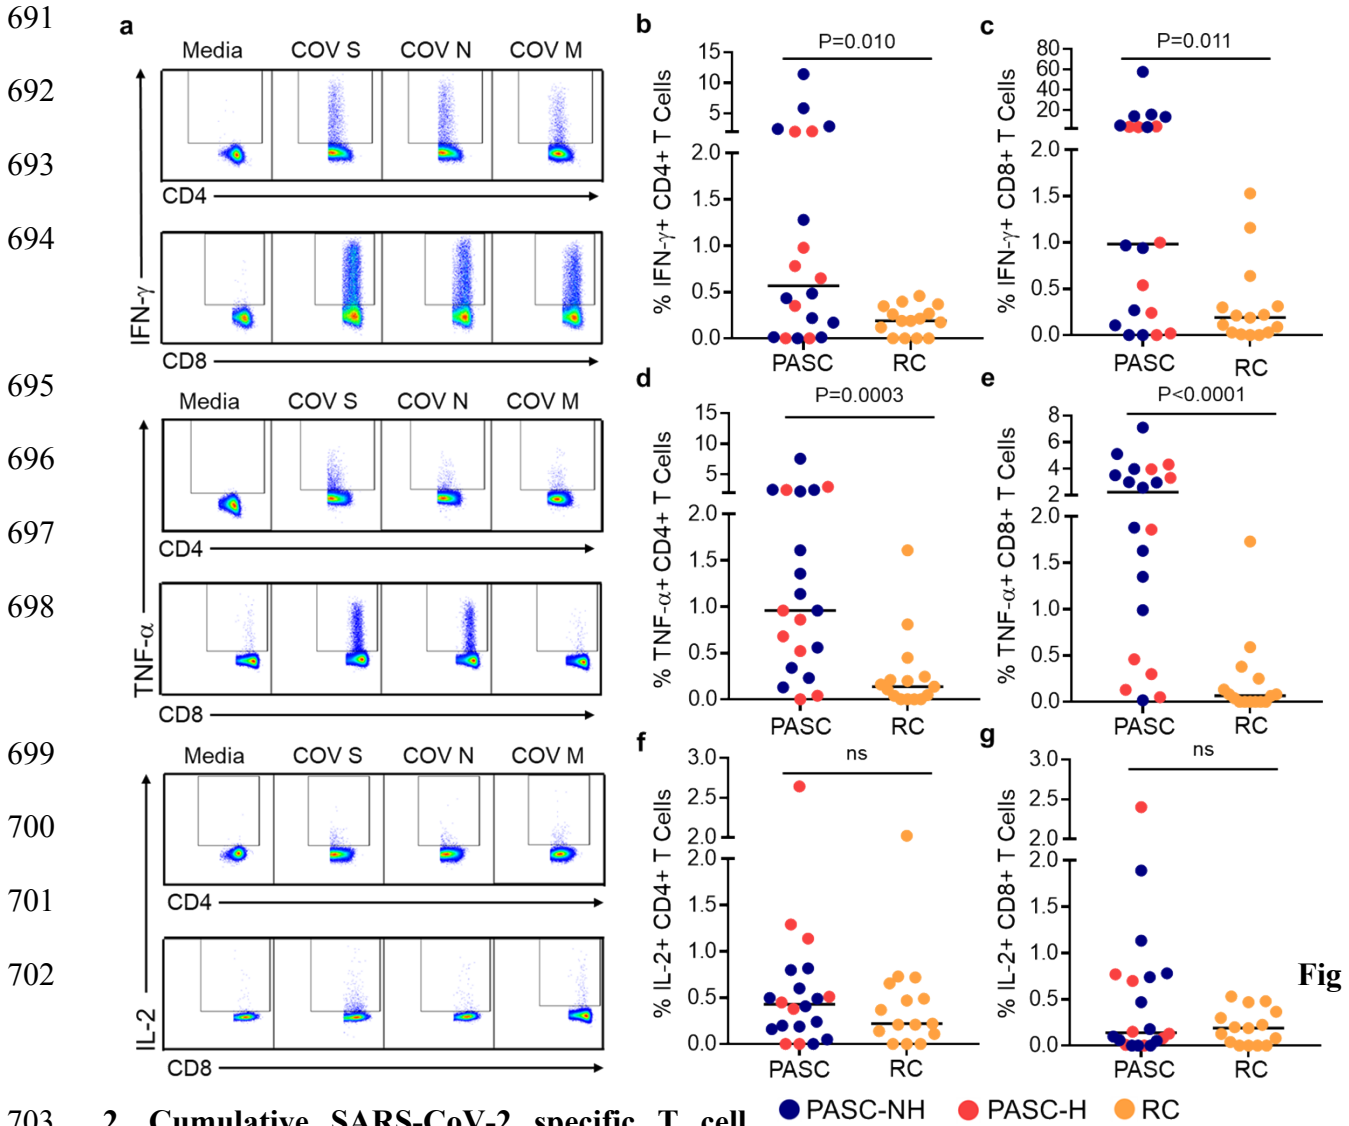

705 (a) Representative flow cytometry density plots of SARS-CoV-2-specific T cells stimulated with  
706 S, N and M peptide pools (5  $\mu\text{g/ml}$ ) for six hours with from one participant with PASC. Samples  
707 were gated through lymphocytes, live, CD3<sup>+</sup>, separated by CD4<sup>+</sup>/CD8<sup>+</sup> and then frequencies of  
708 cytokines were assessed. Percent of total CD4<sup>+</sup> producing (b) IFN- $\gamma$ , (c) TNF- $\alpha$ , (d) IL-2 or CD8<sup>+</sup>  
709 producing (e) IFN- $\gamma$ , (f) TNF- $\alpha$  or (g) IL-2 T cells in response to S, N and M peptide pools. Each  
710 point represents the sum of the combined frequencies of virus-specific T cells to the peptide pools  
711 from each participant. The horizontal bars depict the median values for each cohort. Color labeling  
712 the same as in Figure 1. Mann-Whitney tests were used to determine statistical significance.  
713

714

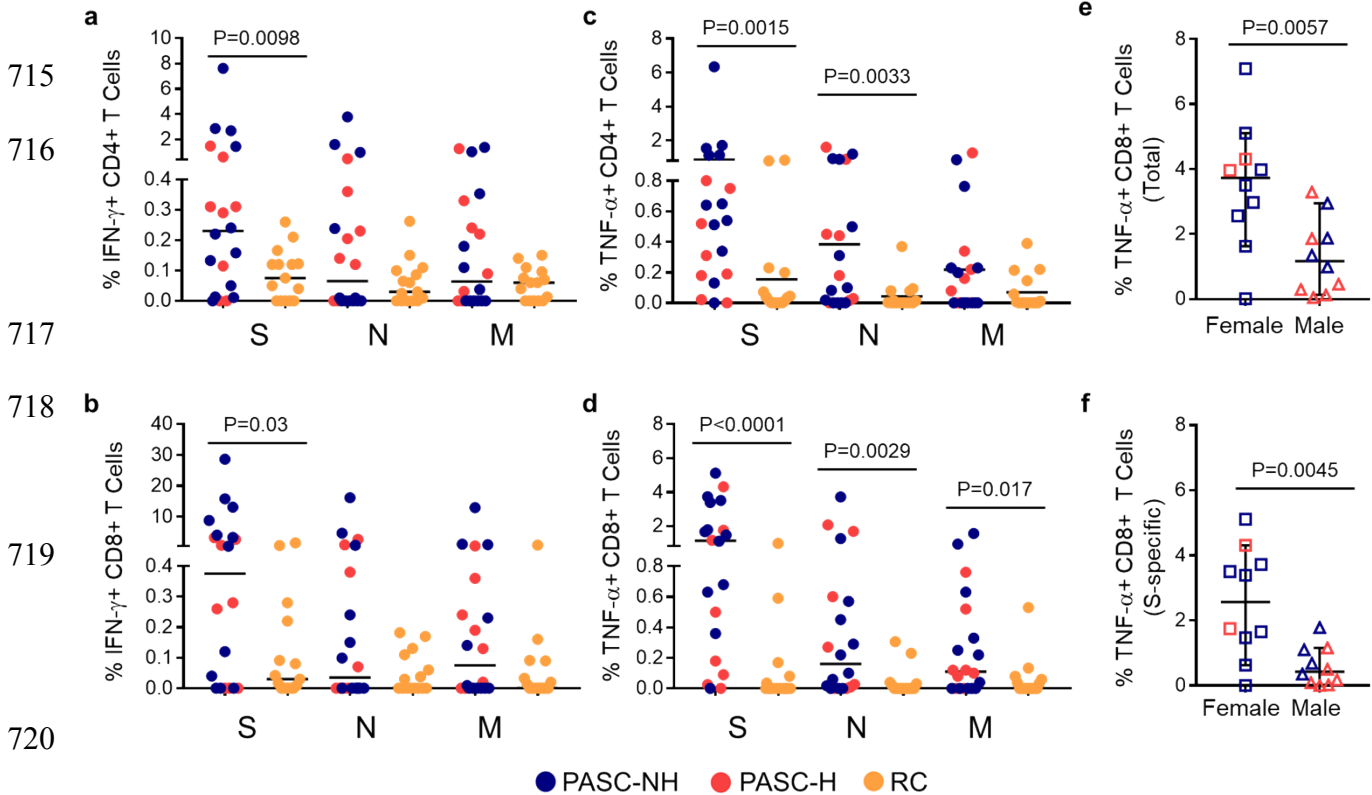

721 **Fig 3. IFN- $\gamma$  and TNF- $\alpha$  producing T cell responses**

723 **to individual SARS-CoV-2 proteins.**

724 Percent of CD4<sup>+</sup> T cells producing (a) IFN- $\gamma$  or (b) TNF- $\alpha$  and CD8<sup>+</sup> T cells producing (c) IFN- $\gamma$   
 725 or (d) TNF- $\alpha$  in response to S, N and M peptide pools separately. (e) Frequency of total (S, N, and  
 726 M) CD8<sup>+</sup> T cells or (f) S-specific CD8<sup>+</sup> T cells producing TNF- $\alpha$  for PASC participants compared  
 727 by sex. Blue represents PASC-NH (not hospitalized), red represents PASC-hospitalized and  
 728 orange represents RC participants. Mann-Whitney tests were used to determine statistical  
 729 significance.  
 730



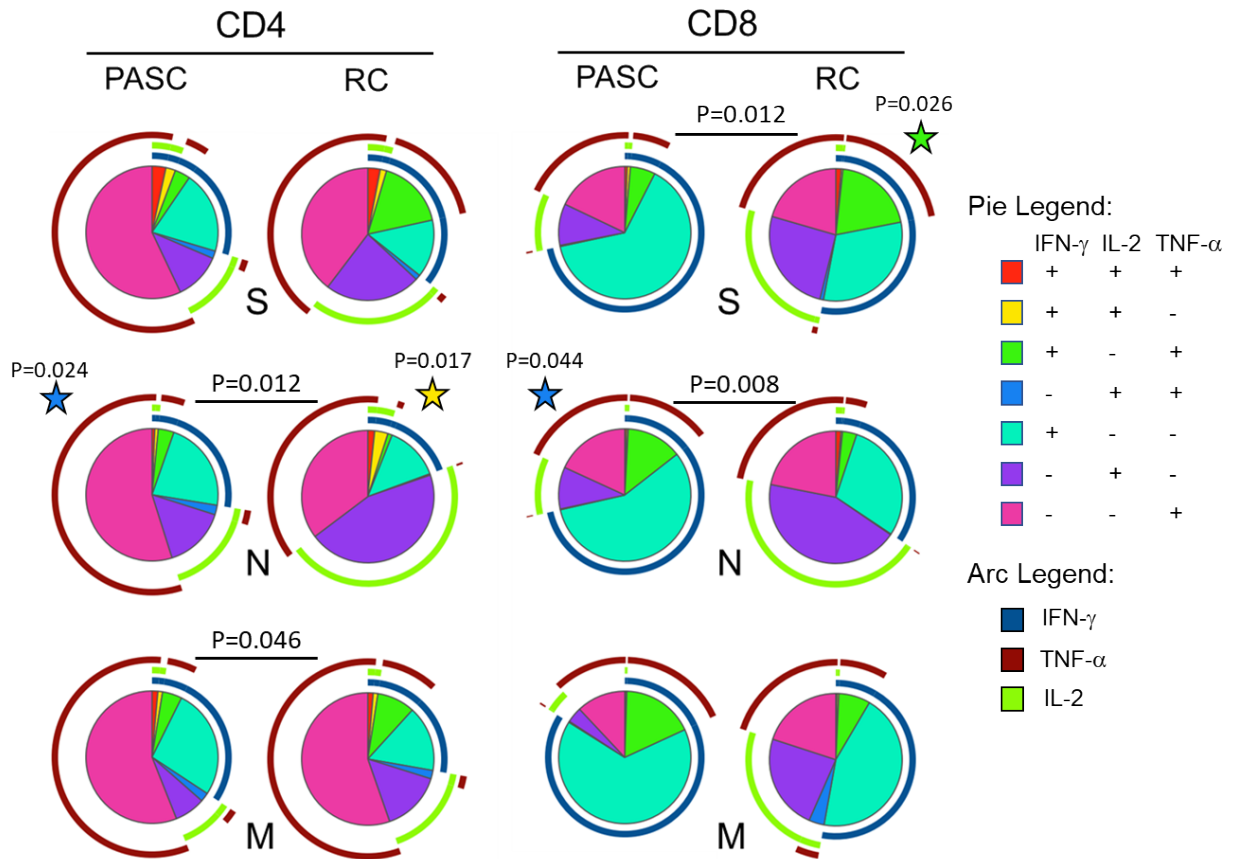

731

732 **Fig 4. Cytokine co-expression of SARS-CoV-2 specific T cells differs between PASC and RC.**

733 Cytokine co-expression on SARS-CoV-2 specific T cells visualized using simplified presentation  
 734 of incredibly complex evaluations (SPICE) analysis. Each pie chart represents the proportions of  
 735 combinations of IFN- $\gamma$ , TNF- $\alpha$  and IL-2 producing T cells in response to one SARS-CoV-2  
 736 protein. Arcs surrounding each pie chart depict the proportion of cells secreting each individual  
 737 cytokine. Colors for pie charts and arcs represent different cytokines or combinations of cytokines  
 738 and are listed in their corresponding legend. Stars denote significant differences determined by  
 739 student t test between PASC and RC cohorts for a particular combination of co-expressed  
 740 cytokines matching as indicated by the color corresponding to the pie legend. Stars are positioned  
 741 next to the cohort with the higher proportion. P values positioned between PASC and RC pie charts  
 742 denote statistical significance of overall composition by permutation test with 10,000 iterations.

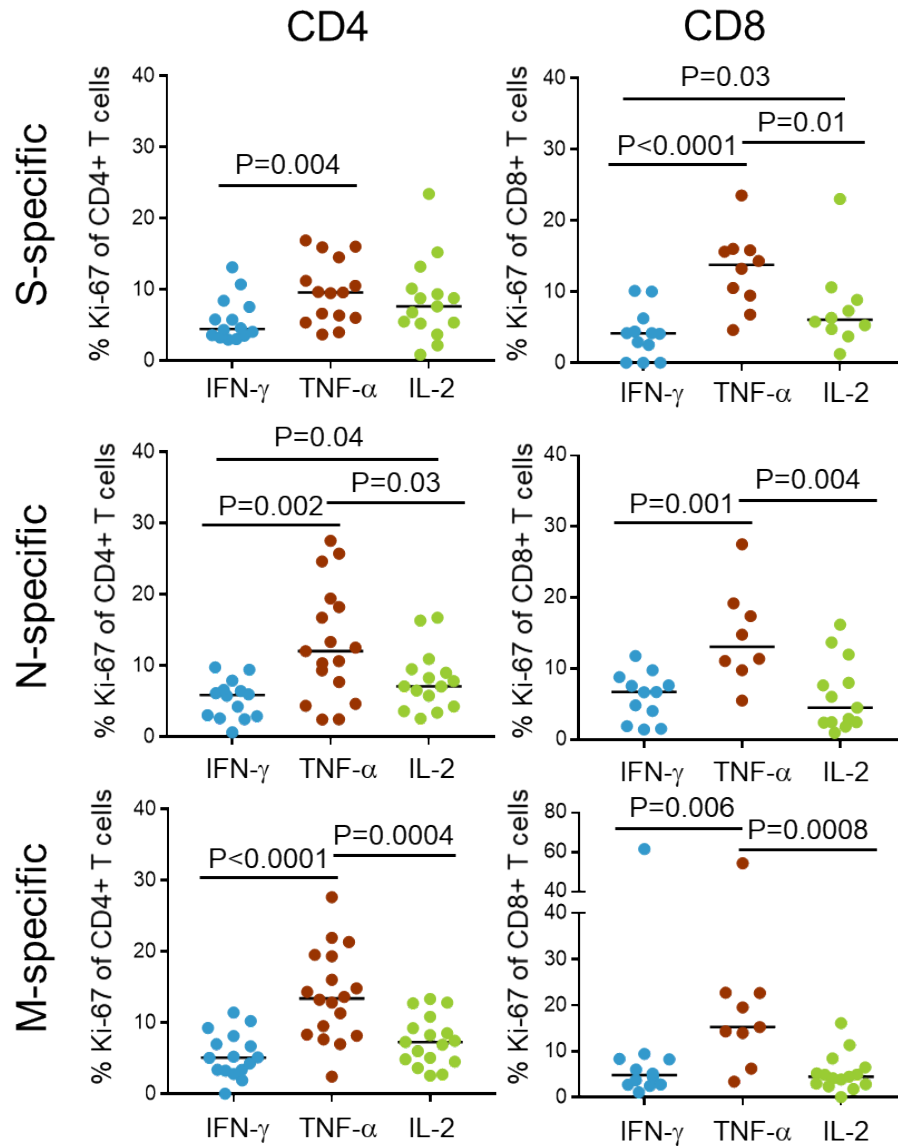

743

744 **Fig 5. TNF- $\alpha$ -producing T cells have the highest proportion of Ki-67 expression.**

745 Shown are the percentages of CD4 T cells (left panels) and CD8 T cells (right panels) obtained  
746 from the blood of PASC participants that are positive for Ki-67 expression. T cell populations  
747 are further grouped by their production of cytokines and responses to peptide pools of SARS-  
748 CoV-2 structural proteins (S, top panels; N, middle panels; M, bottom panels). Note, data points  
749 from individual PASC participants were obtained for 1 or more of the cytokines assessed;  
750 however, in no instances are there multiple values obtained from the same participant for a  
751 particular cytokine. Blue represents IFN- $\gamma$ <sup>+</sup> T cells, brown represents TNF- $\alpha$ <sup>+</sup> T cells and green  
752 represents IL-2<sup>+</sup> T cells. Mann-Whitney tests were used to determine statistical significance.  
753

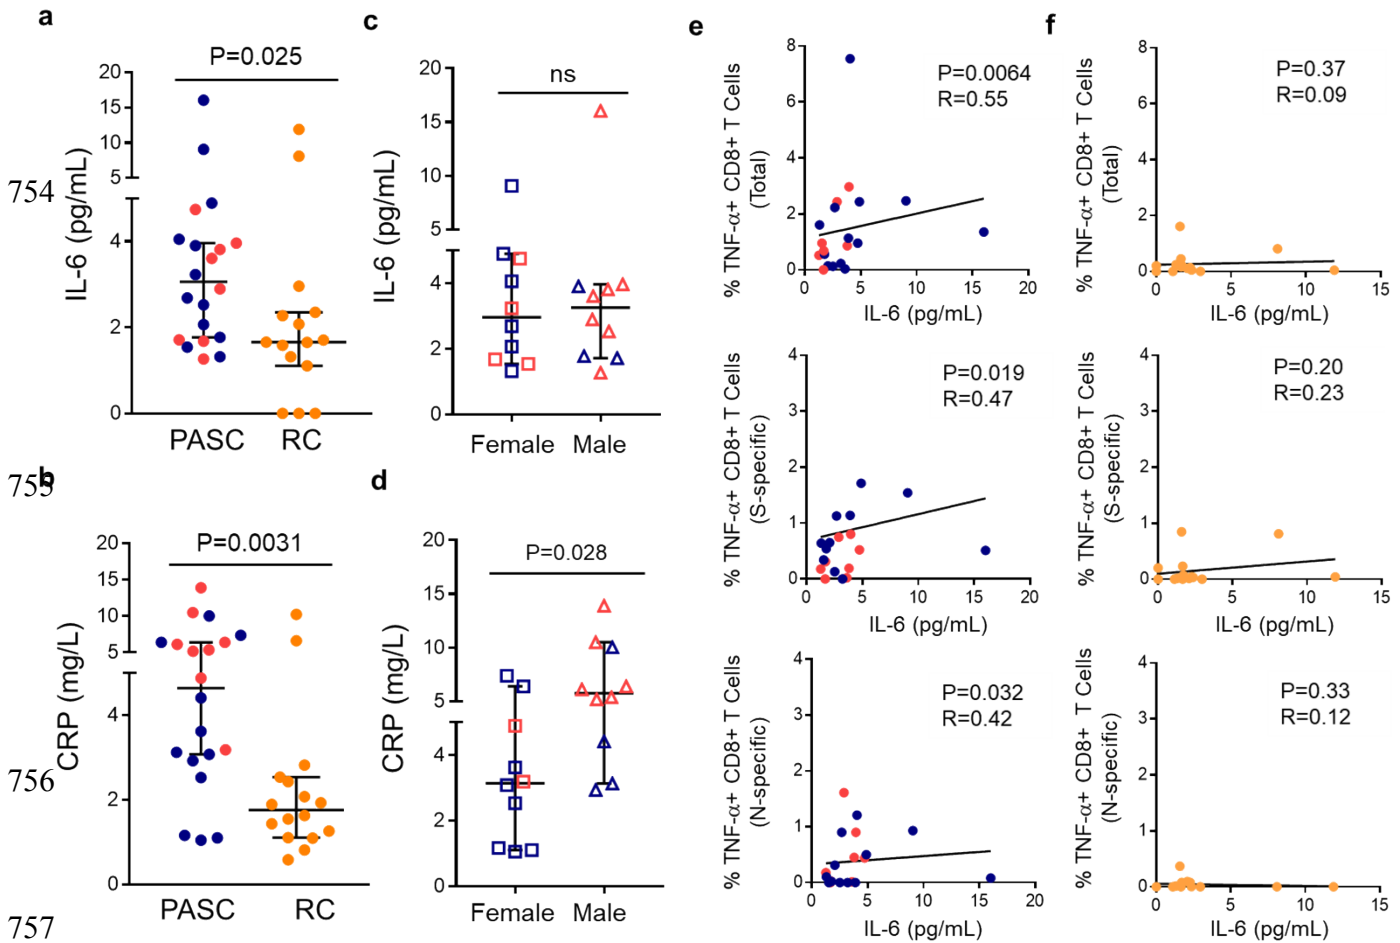

759 **Fig 6. Plasma IL-6 in** ● PASC-NH ● PASC-H ● RC **PASC is higher than RC and**  
 760 **correlates with frequency of TNF- $\alpha$  producing CD8<sup>+</sup> T cells.**

761 (a) Plasma IL-6 levels (pg/mL) and (b) plasma CRP levels (mg/L) in PASC versus RC. (c) PASC  
 762 plasma IL-6 (pg/mL) levels and (d) PASC plasma CRP levels (mg/L) in female versus male. €  
 763 Correlations between plasma IL-6 and frequency of TNF- $\alpha$ -producing CD8<sup>+</sup> T cells in PASC  
 764 participants. (f) Correlations between plasma IL-6 and frequency of TNF- $\alpha$ -producing CD8<sup>+</sup> T  
 765 cells in RC participants. For a-d, bar represents median of cohort and error bar is 95% confidence  
 766 index. Each point represents data from one participant. Blue: PASC-NH (not hospitalized), red:  
 767 PASC-Hospitalized and orange: RC participants. For a-d Mann-Whitney tests were used to  
 768 determine statistical significance. For e-f Spearman correlations were used to determine statistical  
 769 significance.

770

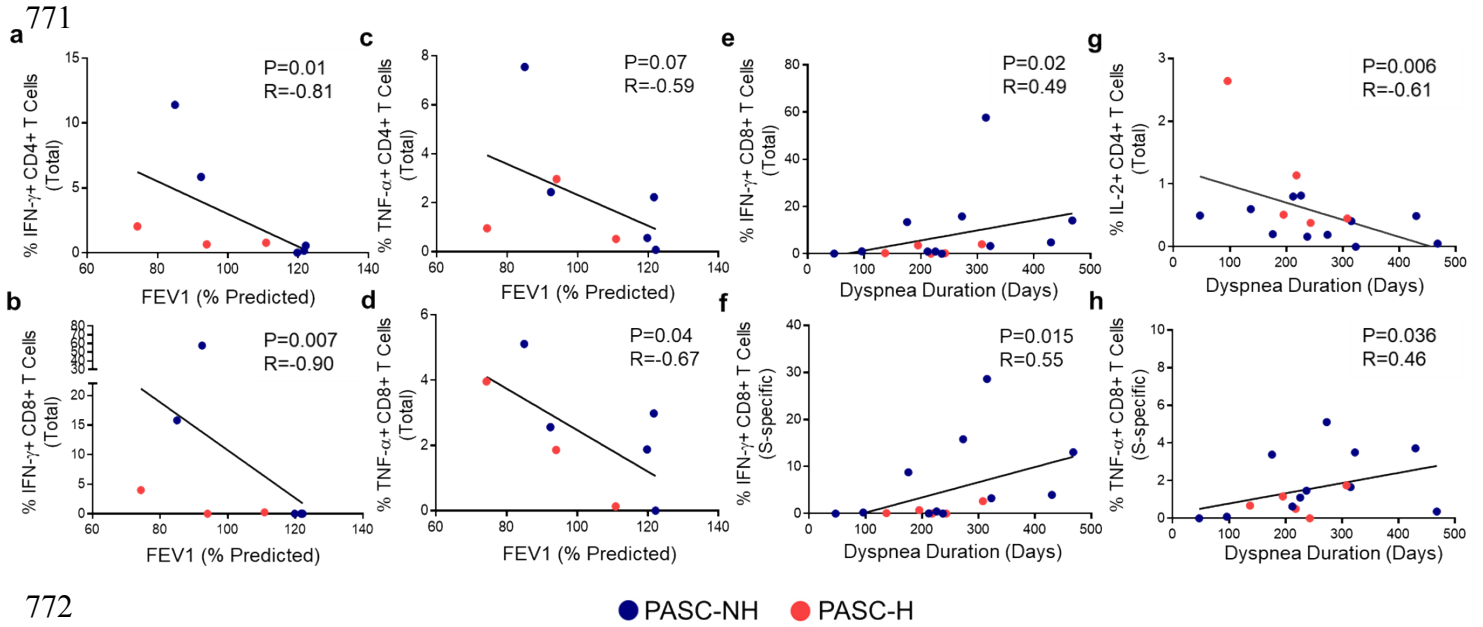

773 **Fig 7. Correlations between SARS-CoV-2 specific T cells and FEV<sub>1</sub> and symptoms in PASC.**

774 Correlations between the total frequency of IFN- $\gamma$ -producing (a) CD4<sup>+</sup>, (b) CD8<sup>+</sup> SARS-CoV-2-  
 775 specific T cells, TNF- $\alpha$ -producing (c) CD4<sup>+</sup>, (d) CD8<sup>+</sup> SARS-CoV-2-specific T cells, with percent  
 776 predicted FEV<sub>1</sub>. Correlations between frequencies of (e) total and (f) S-specific IFN- $\gamma$ -producing  
 777 CD8<sup>+</sup> T cells, (g) total IL-2-producing CD4<sup>+</sup> T cells and (h) S-specific TNF- $\alpha$ -producing CD8<sup>+</sup> T  
 778 cells with duration of prolonged dyspnea in days. Each point represents data from one PASC  
 779 participant. Blue and red symbols represent PASC-NH (not hospitalized) and PASC-Hospitalized  
 780 participants, respectively. Spearman correlations were used to determine statistical significance.
